# Supplementary material
Source: Research Square preprint supplement (doi:10.21203/rs.3.rs-8802187/v1)
Supplement: Supplementary file 1 [file df106820ff2fc552b7159977.pdf]

## Supplementary Tables

**Supplementary Table 1: Description and primer sequences for genotyping and selected genes tested by RT-qPCR.**

| Gene Symbol                      | Gene Name                                | Gene Function                               | Forward Sequence (5' → 3') | Reverse Sequence (5' → 3') |
|----------------------------------|------------------------------------------|---------------------------------------------|----------------------------|----------------------------|
| <b>Genotyping</b>                |                                          |                                             |                            |                            |
| <i>ErbB2<sup>tm1Mll</sup></i>    | Erb-b2 receptor tyrosine kinase 2        | ERBB tyrosine kinase receptor               | GATGAATTGCCCGTCGTT         | GCCCTCTTGTCTACTTCTGGG      |
| <i>Tg(Vil-Cre)20Syr</i>          | Transgene                                | Cre recombinase expression                  | GTGATGAGGTTCCGAAGAAC       | AGCATTGCTGTCACTTGGTC       |
| <b>ERBB family members</b>       |                                          |                                             |                            |                            |
| <i>Egfr</i>                      | Epidermal Growth Factor Receptor         | ERBB tyrosine kinase receptor               | GCATCATGGGAGAGAACAACA      | CTGCCATTGAACGTACCCAGA      |
| <i>ErbB2</i>                     | Epidermal growth factor receptor 2       | ERBB tyrosine kinase receptor               | GAGACAGAGCTAAGGAAGCTGA     | ACGGGGATTTTCACGTTCTCC      |
| <i>ErbB3</i>                     | Epidermal growth factor receptor 3       | ERBB tyrosine kinase receptor               | TCTGCATTAAGTCATCGAGGAC     | CAGCCGTACAATGTGGGCAT       |
| <i>ErbB4</i>                     | Epidermal growth factor receptor 4       | ERBB tyrosine kinase receptor               | TCCCCAGGCTTTCAACATAC       | GCACCCTGAGCTACTGGAG        |
| <i>Egf</i>                       | Epidermal Growth Factor                  | Growth Factor ligand                        | TTCTCACAAGGAAAGAGCATCTC    | GTCTGTCCCGTTAAGGAAAAAC     |
| <i>Tgfa</i>                      | Transforming growth factor alpha         | Growth Factor ligand                        | CACTCTGGGTACGTGGGTG        | CACAGGTGATAATGAGGACAGC     |
| <i>Areg</i>                      | Amphiregulin                             | Growth Factor ligand                        | GCCTCCGAAGTGTGGTATCC       | CCTGGTACTGTCCAACGCA        |
| <i>Epgn</i>                      | Epigen                                   | Growth Factor ligand                        | GGGGTTCTGATAGCAGTCTG       | TCGGTGTGTTAAATGTCCAGTT     |
| <i>Btc</i>                       | Betacellulin                             | Growth Factor ligand                        | AATTCTCCACTGTGTGGTAGCA     | GGTTTTCACTTTCTGTCTAGGGG    |
| <i>Hbegf</i>                     | Heparin-binding Egf                      | Growth Factor ligand                        | CGGGGAGTGCAGATACCTG        | TTCTCCACTGGTAGAGTCAGC      |
| <i>Ereg</i>                      | Epiregulin                               | Growth Factor ligand                        | CTGCCTCTTGGGTCTTGACG       | GCGGTACAGTTATCCTCGGATTC    |
| <i>Nrg1</i>                      | Neuregulin 1                             | Growth Factor ligand                        | TCAGCAAGTTAGGAAACGACAG     | ACATAGGGTCTTTCAGTTGAGGC    |
| <i>Nrg2</i>                      | Neuregulin 2                             | Growth Factor ligand                        | GGATGGCAAGGAACTCAACC       | TCGGCCTCACAGACGTAAT        |
| <i>Nrg3</i>                      | Neuregulin 3                             | Growth Factor ligand                        | TTACGCTGTAGCGACTGCATC      | GCCTACCACGATCCATTTAAGC     |
| <i>Nrg4</i>                      | Neuregulin 4                             | Growth Factor ligand                        | CACGCTGCGAAGAGGTTTTTC      | CGCGATGGTAAGAGTGAGGA       |
| <b>RNA sequencing validation</b> |                                          |                                             |                            |                            |
| <i>Col1a1</i>                    | Collagen Type 1 Alpha 1 Chain            | Extracellular matrix structural constituent | GACTGGAAGAGCGGAGAGTA       | CCATGTTGCAGTAGACCTTGA      |
| <i>Ctnnb1</i>                    | Catenin beta 1                           | Transcription regulator                     | TGAGGACCAGGTGGTAGTTAAT     | GTACAATGGCAGACACCATCT      |
| <i>Jun</i>                       | Jun proto-oncogene                       | Transcription regulator                     | CAAGAACGTGACCGACGAG        | TGTTCTGGCTATGCAGTTCAG      |
| <i>Mapk4</i>                     | Mitogen-activated protein kinase 4       | Serine/threonine kinase                     | CGTCAACAGTGAAGCCATTGA      | GGCTCATGTAAGGATGCTGAAG     |
| <b>Reference genes</b>           |                                          |                                             |                            |                            |
| <i>Actb</i>                      | Beta Actin                               | Cytoskeletal structural protein             | GGCTGTATTCCCCTCCATCG       | CCAGTTGGTAACAATGCCATGT     |
| <i>Gapdh</i>                     | Glyceraldehyde 3-phosphate dehydrogenase | Glycolysis pathway enzyme                   | AGGTCGGTGTGAACGGATTTG      | GGGGTCGTTGATGGCAACA        |

**Supplementary Table 2: Top human molecular signatures overlapping with expression signatures of *ErbB2*-deficient colon tumors.**

| <b>Gene Set Name</b>                                | <b>Description</b>                                                                                                           | <b>p-value</b> | <b>FDR q-value</b> |
|-----------------------------------------------------|------------------------------------------------------------------------------------------------------------------------------|----------------|--------------------|
| Hallmark – Epithelial to Mesenchymal Transition     | Genes defining epithelial to mesenchymal transition, as in wound healing, fibrosis and metastasis                            | 1.19E-10       | 2.85E-8            |
| EGFR upregulation                                   | Genes up-regulated in MCF-7 cells (breast cancer) positive for ESR1 and engineered to express ligand-activatable EGFR        | 5.63E-10       | 6.72E-8            |
| MEK upregulation                                    | Genes up-regulated in MCF-7 cells (breast cancer) positive for ESR1 stably over-expressing constitutively active MAP2K1 gene | 5.83E-9        | 4.64E-7            |
| LEF1 upregulation                                   | Genes up-regulated in DLD1 cells (colon carcinoma) over-expressing LEF1                                                      | 3.01E-7        | 1.2E-5             |
| Hallmark – TNF $\alpha$ signaling via NF $\kappa$ B | Genes regulated by NF- $\kappa$ B in response to TNF                                                                         | 4.26E-7        | 1.46E-5            |
| IL2 upregulation                                    | Genes up-regulated in Sez-4 cells (T lymphocyte) that were first starved of IL2 and then stimulated with IL2                 | 1.6E-6         | 4.78E-5            |
| KRAS upregulation                                   | Genes up-regulated in four lineages of epithelial cell lines over-expressing an oncogenic form of KRAS gene                  | 3.23E-6        | 7.73E-5            |
| Hallmark – IL2 STAT5 signaling                      | Genes up-regulated by STAT5 in response to IL2 stimulation                                                                   | 1.53E-5        | 2.26E-4            |
| Hallmark – TGF $\beta$ signaling                    | Genes up-regulated in response to TGFB1                                                                                      | 2.92E-5        | 3.88E-4            |
| PTEN downregulation                                 | Genes down-regulated in HCT116 cells (colon carcinoma) upon knockdown of PTEN by RNAi                                        | 3.31E-5        | 4.16E-4            |

## Supplemental Figures

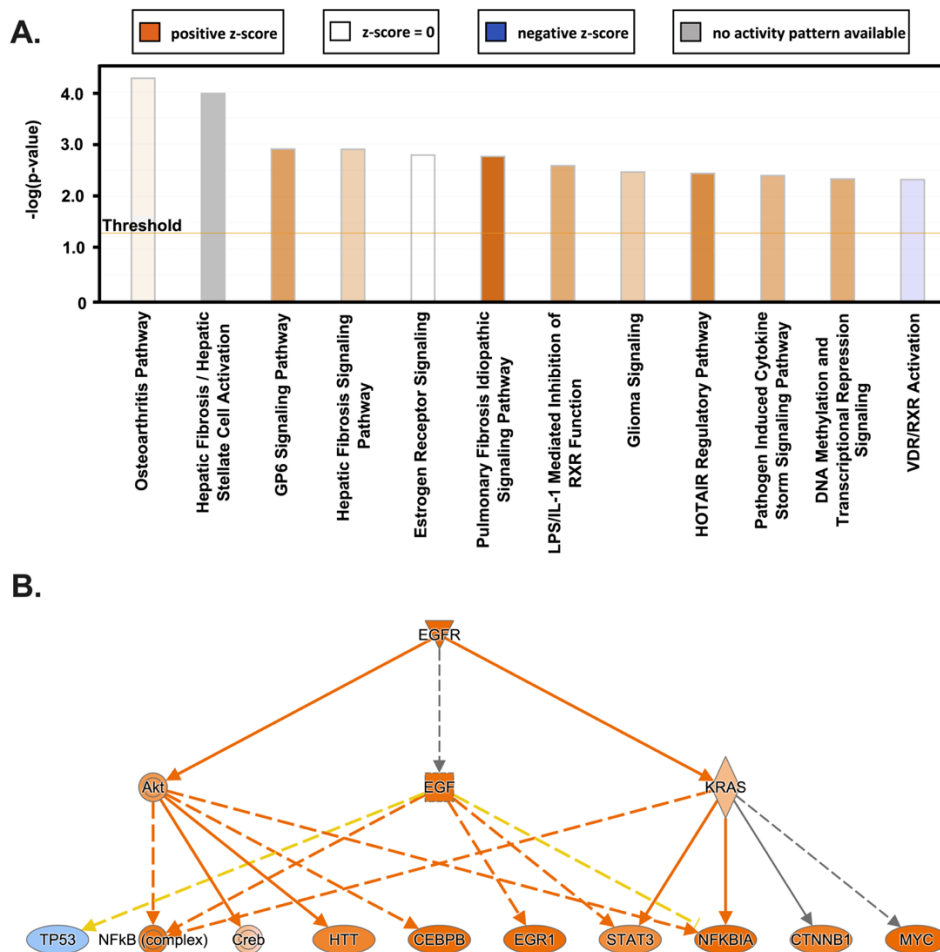

**Supplementary Fig. 1: Transcriptomic analysis of *Erbb2*-deficient intestinal polyps.**

**A** Top significant canonical pathways altered in *Erbb2*-deficient tumors as predicted by IPA. **B** Prediction of activation of EGFR in *Erbb2*-deficient intestinal polyps. Blue indicates negative activation z-scores, while orange indicates positive activation z-scores.

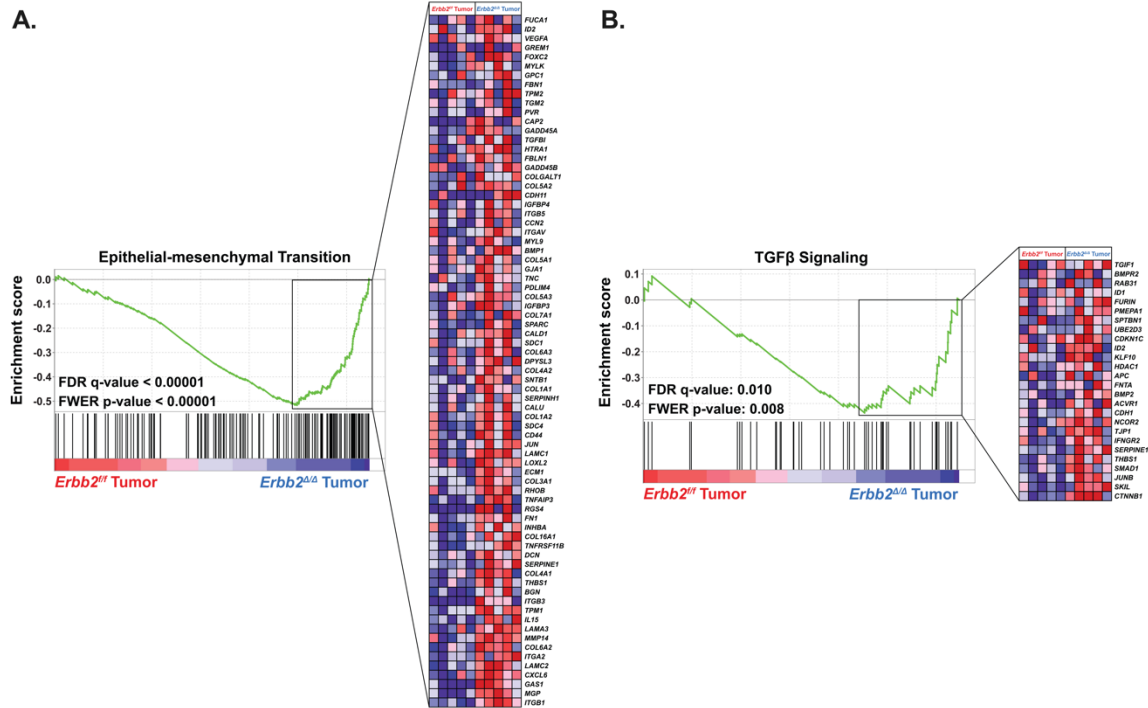

**Supplementary Fig. 2: Gene set enrichment analysis (GSEA) reveals enrichment of oncogenic hallmarks in *Erbb2*-deficient *Apc<sup>Min/+</sup>* colon tumors.**

GSEA analysis of hallmarks of **A** epithelial to mesenchymal plasticity and **B** TGFβ signaling oncogenic human molecular signatures. The green line indicates the enrichment score of each ranked gene in the pathway represented by black lines below the X axis. Heatmaps display the relative gene expression of markers in the leading-edge subset. Heat map is displayed as a spectrum from high expression (dark red) to low expression (dark blue).

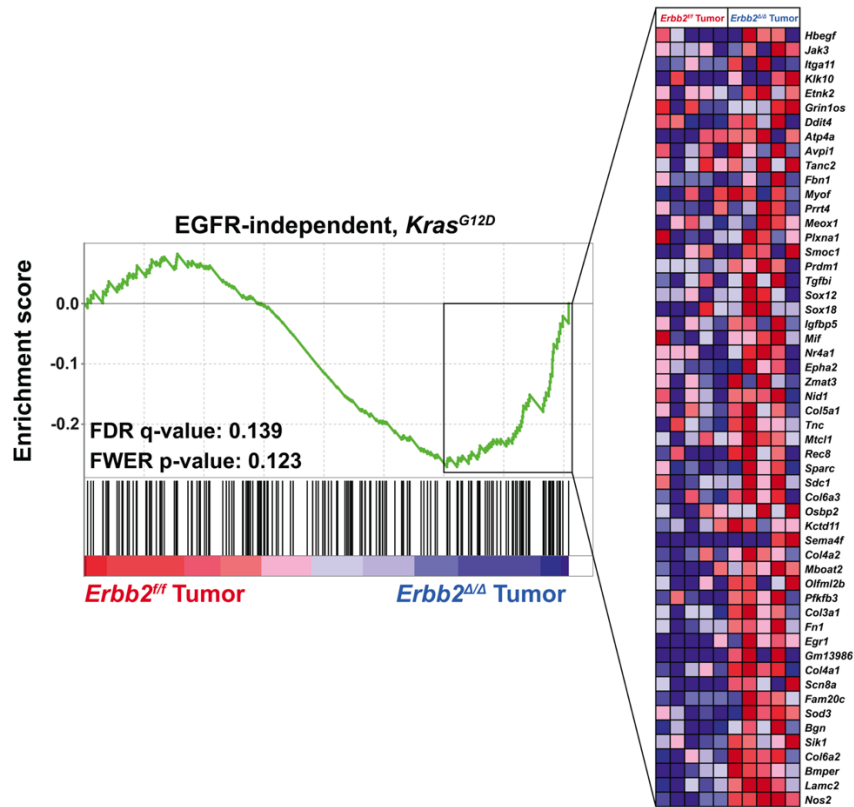

**Supplementary Fig. 3: The *Kras*<sup>G12D</sup> mutation modifies enrichment of the *Erbb2*-deficient tumor transcriptomic profile with EGFR-independent CRC.**

GSEA of genes upregulated in the EGFR-independent with *Kras*<sup>G12D</sup> activating mutation (*Apc*<sup>fl/fl</sup>, *Egfr*<sup>fl/fl</sup>, *Kras*<sup>G12D/+</sup>) oncogenic mouse molecular signature. Green line indicates enrichment score of each ranked gene in the pathway represented by black lines below the X axis. Heatmaps display the relative gene expression of markers in the leading-edge subset. Heat map is displayed as a spectrum from high expression (dark red) to low expression (dark blue).
